# Supplementary material for: Evolution of vertical and oblique transmission under fluctuating selection
Source: PubMed Central journal article supplement — Proc Natl Acad Sci U S A. 2018 Jan 23;115(6):E1174–83. doi: 10.1073/pnas.1719171115 (PMC5819448; doi:10.1073/pnas.1719171115), 2018-01-23
Supplement: pnas.201719171SI.pdf [file pnas.201719171SI.pdf]

# Supporting Information

Ram et al. 10.1073/pnas.1719171115

## SI Text

**Proof of Uniqueness in Result 5.** Following Eq. 10, the transformation of the frequency  $x$  of phenotype  $A$  is

$$x' = F(x) = \underbrace{F_B \circ \dots \circ F_B}_{l \text{ times}} \circ \underbrace{F_A \circ \dots \circ F_A}_{k \text{ times}}(x). \quad [\text{S1}]$$

Using Eqs. 25 and 26, we can write

$$F'_A(x) = \rho \frac{wW}{[\bar{w}(x)]^2} + (1 - \rho), \quad \bar{w}(x) = (W - w)x + w \quad [\text{S2}]$$

$$F'_B(x) = \rho \frac{wW}{[\tilde{w}(x)]^2} + (1 - \rho), \quad \tilde{w}(x) = (w - W)x + W. \quad [\text{S3}]$$

Since  $F'_A(x) > 0$ ,  $F'_B(x) > 0$  for  $0 \leq x \leq 1$ , all of the functions  $F_A$ ,  $F_B$ ,  $F_A \circ \dots \circ F_A$ ,  $F_B \circ \dots \circ F_B$ , and  $F$  are monotone increasing for  $0 \leq x \leq 1$ .

From Result 2, the two fixations  $x = 0$  and  $x = 1$  are not stable, because  $F'(0) > 1$  and  $F'(1) > 1$ . Therefore,

$$F(x) - x > 0 \text{ for } x > 0 \text{ "near" } x = 0, \quad [\text{S4}]$$

$$F(x) - x < 0 \text{ for } x < 1 \text{ "near" } x = 1. \quad [\text{S5}]$$

Hence, as  $F(x) - x$  is a continuous function of  $x$  for  $0 \leq x \leq 1$ , there exists (at least one) polymorphic equilibrium  $x^*$  with  $0 < x^* < 1$ , such that  $F(x^*) = x^*$ .

If there is more than one polymorphic equilibrium, and as there is a finite number of equilibria, let  $x^*$  be the "closest" polymorphic equilibrium to  $x = 0$ . Since  $F(x) > x$  for  $0 < x < x^*$ ,  $F(x) < x$  for  $x > x^*$  (at least "near"  $x^*$ ), and  $F(x)$  is a monotone increasing function in  $[0, 1]$ ,  $x^*$  must be locally stable.

Let  $\hat{x} = F(\hat{x})$  with  $0 < \hat{x} < 1$  be any polymorphic equilibrium; then, from [S1], its evolution in the  $k + k$  generations is

$$\hat{x} \xrightarrow{A} \hat{x}_1 \xrightarrow{A} \dots \xrightarrow{A} x_{k-1} \xrightarrow{B} \hat{y}_0 \xrightarrow{B} \hat{y}_1 \xrightarrow{\dots} \hat{y}_{k-1} \xrightarrow{A} \hat{x}_0 = \hat{x}. \quad [\text{S6}]$$

Due to the symmetry between phenotypes  $A$  and  $B$ , we have

$$\hat{y}_t = 1 - \hat{x}_t, \quad \bar{w}(\hat{x}_t) = \tilde{w}(\hat{y}_t) \quad [\text{S7}]$$

for all  $t = 0, 1, 2, \dots, k - 1$ .

The polymorphic equilibrium  $\hat{x}$  is locally stable if  $F'(\hat{x}) < 1$  or from [S1–S3], if

$$\prod_{t=0}^{k-1} \left\{ \rho \frac{wW}{[\bar{w}(\hat{x}_t)]^2} + (1 - \rho) \right\} \cdot \prod_{t=0}^{k-1} \left\{ \rho \frac{wW}{[\tilde{w}(\hat{y}_t)]^2} + (1 - \rho) \right\} < 1. \quad [\text{S8}]$$

Applying [S7], we conclude that  $\hat{x}$  is locally stable if

$$\prod_{t=0}^{k-1} \left\{ \rho \frac{wW}{[\bar{w}(\hat{x}_t)]^2} + (1 - \rho) \right\} < 1. \quad [\text{S9}]$$

As  $x^*$ , the closest polymorphic equilibrium to  $x = 0$ , is stable, then [S9] implies that

$$\prod_{t=0}^{k-1} \left\{ \rho \frac{wW}{[\bar{w}(x_t^*)]^2} + (1 - \rho) \right\} \leq 1, \quad [\text{S10}]$$

where  $x_t^*$  for  $t = 0, 1, \dots, k - 1$  is defined as in [S6].

If  $\hat{x}$  is any polymorphic equilibrium other than  $x^*$ , then  $\hat{x} > x^*$  or  $\hat{x}_0 > x_0^*$  by [S4]. Since  $F_A$  is a monotone increasing function and

$$\hat{x}_{t+1} = F_A(\hat{x}_t), \quad x_{t+1}^* = F_A(x_t^*) \quad t = 0, 1, \dots, k - 1, \quad [\text{S11}]$$

then by induction, we have  $\hat{x}_t > x_t^*$  for all  $t = 0, 1, 2, \dots, k - 1$ . In addition, as  $\bar{w}(x) = (W - w)x + w$  and  $W > w$ , we also have  $\bar{w}(\hat{x}_t) > \bar{w}(x_t^*)$  for all  $t = 0, 1, 2, \dots, k - 1$  and

$$\prod_{t=0}^{k-1} \left\{ \rho \frac{wW}{[\bar{w}(\hat{x}_t)]^2} + (1 - \rho) \right\} < \prod_{t=0}^{k-1} \left\{ \rho \frac{wW}{[\bar{w}(x_t^*)]^2} + (1 - \rho) \right\} \leq 1. \quad [\text{S12}]$$

Hence,  $\hat{x}$  is also locally stable. However, it is impossible that all polymorphic equilibria are stable unless there is only one stable polymorphic equilibrium. Therefore,  $x^*$  is the unique stable polymorphic equilibrium, and since  $F(x) > x$  for  $0 < x < x^*$ ,  $F(x) < x$  for  $x^* < x < 1$ , and  $F(x)$  is monotone increasing in  $[0, 1]$ , therefore,  $x^*$  is globally stable.

**Proof of Result 6.** Rewrite recursion Eq. 28 as

$$\frac{x_t + 1}{x_t} = (1 + \rho s_t) \left[ 1 - x_t \frac{\rho s_t (1 + s_t)}{(1 + \rho s_t)(1 + x_t s_t)} \right]. \quad [\text{S13}]$$

Then,

$$\log x_{t+1} - \log x_t = \log(1 + \rho s_t) + \log \left[ 1 - x_t \frac{\rho s_t (1 + s_t)}{(1 + \rho s_t)(1 + x_t s_t)} \right]. \quad [\text{S14}]$$

Summation yields

$$\frac{1}{t} [\log x_t - \log x_0] = \frac{1}{t} \sum_{n=0}^{t-1} \log(1 + \rho s_n) + \frac{1}{t} \sum_{n=0}^{t-1} \log \left[ 1 - x_n \frac{\rho s_n (1 + s_n)}{(1 + \rho s_n)(1 + x_n s_n)} \right]. \quad [\text{S15}]$$

Let  $\mu = E[\log(1 + \rho s_t)]$ . As  $\{s_t\}_{t \geq 0}$  are independent and identically distributed random variables, the strong law of large numbers applies, and

$$\lim_{t \rightarrow \infty} \frac{1}{t} \sum_{n=0}^{t-1} \log(1 + \rho s_n) = \mu \quad [\text{S16}]$$

almost surely.

Let  $\zeta$  be such that  $\frac{1}{t} \sum_{n=0}^{t-1} \log[1 + \rho s_n(\zeta)] = \mu$ , and assume that  $\lim_{t \rightarrow \infty} x_t(\zeta) = 0$ . As the random variables  $\{s_t\}_{t \geq 0}$  are uniformly bounded,

$$x_t(\zeta) \frac{\rho s_t(\zeta)[1 + s_t(\zeta)]}{[1 + \rho s_t(\zeta)][1 + x_t(\zeta)s_t(\zeta)]} \rightarrow 0 \quad t \rightarrow \infty \quad [\text{S17}]$$

and

$$\lim_{t \rightarrow \infty} \frac{1}{t} \sum_{n=0}^{t-1} \log \left[ 1 - x_n(\zeta) \frac{\rho x_n(\zeta)[1 + s_n(\zeta)]}{[1 + \rho s_n(\zeta)][1 + x_n(\zeta)s_n(\zeta)]} \right] = 0. \quad [\text{S18}]$$

Thus, [S15] implies that

$$\lim_{t \rightarrow \infty} \frac{1}{t} [\log x_t(\zeta) - \log x_0(\zeta)] = \mu. \quad [\text{S19}]$$

If  $\mu = E[\log(1 + s_t)] > 0$ , then from [S19], we deduce that  $\lim_{t \rightarrow \infty} x_t(\zeta) = \infty$ , a contradiction. Therefore, when  $\mu > 0$ ,  $P(\lim_{t \rightarrow \infty} x_t = 0) = 0$ , and fixation of  $B$  ( $x^* = 0$ ) is stochastically locally unstable.

Thus, by Result 6, for  $x^* = 0$  to be stochastically locally stable, it is necessary that  $E[\log(1 + \rho s_t)] \leq 0$ . In fact, the strict inequality is sufficient.

Fig. 3 presents a numerical example of the dynamics of recursion Eq. 28 with a specific random selection coefficient  $s_t$ .

**Proof of Result 7.** Let  $\mu = E[\log(1 + \rho s_t)]$ . Then, as  $\{s_t\}_{t \geq 0}$  are independent and identically distributed random variables, the strong law of large number applies and almost surely

$$\lim_{t \rightarrow \infty} \frac{1}{t} \sum_{n=0}^{t-1} \log(1 + \rho s_n) = \mu < 0. \quad [\text{S20}]$$

Appealing to the Egoroff Theorem, for any  $\epsilon > 0$ , there exists  $T$ , such that

$$P \left( \frac{1}{t} \sum_{n=0}^{t-1} \log(1 + \rho s_n) < \frac{\mu}{2} \text{ for all } t \geq T \right) \geq 1 - \epsilon. \quad [\text{S21}]$$

As  $0 \leq \rho \leq 1$  and the  $\{s_t\}_{t \geq 0}$  are uniformly bounded, we can find a  $\delta' > 0$ , such that

$$x_t < \delta' \implies \left| \log \left[ 1 - x_t \frac{\rho s_t (1 + s_t)}{(1 + \rho s_t)(1 + x_t s_t)} \right] \right| < -\frac{\mu}{4}. \quad [\text{S22}]$$

Also, as  $0 \leq x_t \leq 1$  for all  $t$ ,

$$x_{t+1} = x_t \frac{1 + \rho s_t + x_t(1 - \rho)s_t}{1 + x_t s_t} < K x_t, \quad [\text{S23}]$$

where  $K$  is independent of  $t$ . It follows that there exists a  $\delta$  with  $0 < \delta < \delta'$ , such that

$$x_0 < \delta \implies x_t < \delta' \text{ for all } t = 0, 1, 2, \dots, T - 1. \quad [\text{S24}]$$

Let  $\xi$  be a realization of the evolutionary process, such that

$$\frac{1}{t} \sum_{n=0}^{t-1} \log[1 + \rho s_n(\xi)] < \frac{\mu}{2} \text{ for all } t \geq T, \quad [\text{S25}]$$

and assume that  $x_0 < \delta$ . Then,

$$\begin{aligned} \frac{1}{T} [\log x_T(\xi) - \log x_0(\xi)] &= \\ \frac{1}{T} \sum_{n=0}^{T-1} \log[1 + \rho s_n(\xi)] + \frac{1}{T} \sum_{n=0}^{T-1} \log[1 - x_n(\xi)] \frac{\rho s_n(\xi)[1 + s_n(\xi)]}{[1 + \rho s_n(\xi)][1 + x_n(\xi)s_n(\xi)]} & \\ < \frac{\mu}{2} - \frac{\mu}{4} = \frac{\mu}{4} < 0, & \end{aligned} \quad [\text{S26}]$$

and therefore,  $x_T(\xi) < x_0(\xi) < \delta'$ . Invoking induction, we get that, for  $t \geq T$ ,

$$\frac{1}{t} \log \frac{x_t(\xi)}{x_0} \leq \frac{\mu}{4}, \quad [\text{S27}]$$

or for all  $t \geq T$ ,

$$x_t(\xi) \leq x_0 \exp\left(\frac{\mu}{4}t\right). \quad [\text{S28}]$$

As  $\mu < 0$ , this implies that  $x_t(\xi) \rightarrow 0$  as  $t \rightarrow \infty$ . Therefore, we have shown that, for given  $\epsilon > 0$ , there is a  $\delta > 0$ , such that, if  $0 < x_0 < \delta$ , then  $P(\lim_{t \rightarrow \infty} x_t = 0) \geq 1 - \epsilon$ ; therefore,  $x^* = 0$ , and the fixation in  $B$  is stochastically locally stable. The second statement of *Result 6* follows from the convexity of the log function and Jensen's inequality.

**Proof of Result 8.** The external stability of  $\underline{x}^*$  (Eqs. 35 and 36) to the introduction of the modifier allele  $M$  with rate  $P$  is determined by the linear approximation matrix  $\mathbf{L} = \mathbf{L}_2 \cdot \mathbf{L}_1$  near  $x^*$ , which is derived from Eq. 32 and given by

$$\bar{w}^* \mathbf{L}_1 = \begin{bmatrix} W[(1-P)x_1^* + P] & w(1-P)x_1^* \\ W(1-P)x_2^* & w[(1-P)x_2^* + P] \end{bmatrix} \quad [\text{S29}]$$

and

$$\bar{w}^{**} \mathbf{L}_2 = \begin{bmatrix} w[(1-P)x_1^{**} + P] & W(1-P)x_1^{**} \\ w(1-P)x_2^{**} & W[(1-P)x_2^{**} + P] \end{bmatrix}, \quad [\text{S30}]$$

where  $\underline{x}^{**} = T_1 \underline{x}^*$ ,  $x_1^{**} = x_2^* = 1 - x_1^*$ ,  $x_2^{**} = x_1^*$ , and

$$\bar{w}^* = Wx_1^* + wx_2^*, \quad \bar{w}^{**} = wx_1^{**} + Wx_2^{**}. \quad [\text{S31}]$$

Due to the symmetry between the two phenotypes  $A$  and  $B$  in the  $A1B1$  case, we have  $x_1^{**} = x_2^*$  and  $x_2^{**} = x_1^*$ , so that  $\bar{w}^{**} = \bar{w}^*$ , and in fact,

$$\bar{w}^* \mathbf{L}_2 = \begin{bmatrix} w[(1-P)x_2^* + P] & W(1-P)x_2^* \\ w(1-P)x_1^* & W[(1-P)x_1^* + P] \end{bmatrix}. \quad [\text{S32}]$$

Note that, as  $\underline{x}^* = T_2(T_1 \underline{x}^*)$  with  $x_3^* = x_4^* = 0$ , from [S29] and [S30] with  $P = \rho$ , we have

$$\begin{bmatrix} x_1^* \\ x_2^* \end{bmatrix} = \mathbf{L}_2 \cdot \mathbf{L}_1 \begin{bmatrix} x_1^* \\ x_2^* \end{bmatrix} = \mathbf{L} \begin{bmatrix} x_1^* \\ x_2^* \end{bmatrix}. \quad [\text{S33}]$$

Hence, when  $P = \rho$ , one of the eigenvalues of  $\mathbf{L}$  is one. In general,  $\mathbf{L} = \mathbf{L}_2 \cdot \mathbf{L}_1$ , and using [S29] and [S32], we have

$$\begin{aligned} (\bar{w}^*)^2 \mathbf{L}_{11} &= Ww [(1-P)^2 x_1^* x_2^* + P] + [w(1-P)x_1^*]^2 \\ (\bar{w}^*)^2 \mathbf{L}_{12} &= W(1-P)[P + x_1^*(1-P)][Wx_2^* + wx_1^*] \\ (\bar{w}^*)^2 \mathbf{L}_{21} &= w(1-P)[1 - x_1^*(1-P)][Wx_2^* + wx_1^*] \\ (\bar{w}^*)^2 \mathbf{L}_{22} &= Ww [(1-P)^2 x_1^* x_2^* + P] + [W(1-P)x_2^*]^2. \end{aligned} \quad [\text{S34}]$$

The external stability of  $\underline{x}^*$  is determined by the eigenvalues of  $\mathbf{L}$ , namely the roots of its characteristic polynomial  $R(\lambda) = \det(\mathbf{L} - \lambda I)$ , with  $I$  the  $2 \times 2$  identity matrix. From Eq. S34,  $R(\lambda) = a_2 \lambda^2 + a_1 \lambda + a_0$ , where

$$a_0 = \frac{P^2 W^2 w^2}{(\bar{w}^*)^4}, \quad a_1 = -\frac{2PWw + (1-P)^2 [Wx_2^* + wx_1^*]^2}{(\bar{w}^*)^2}, \quad a_2 = 1. \quad [\text{S35}]$$

As  $\mathbf{L}$  is a positive matrix, by the Perron–Frobenius theorem,  $\mathbf{L}$  has a positive eigenvalue, and as  $a_0 > 0$  and  $a_2 = 1$ , the product of the two eigenvalues of  $\mathbf{L}$  is positive. Thus,  $\mathbf{L}$  has two positive eigenvalues. Let  $R(1) = R(1; P)$ ; then, from [S35],

$$R(1; P) = \frac{W^2 w^2 - (\bar{w}^* \tilde{w}^*)^2}{(\bar{w}^*)^4} P^2 + 2P \frac{(\tilde{w}^*)^2 - Ww}{(\bar{w}^*)^2} + \frac{(\bar{w}^*)^2 - (\tilde{w}^*)^2}{(\bar{w}^*)^2}, \quad [\text{S36}]$$

where  $\tilde{w}^* = Wx_2^* + wx_1^*$ .

By Eq. 36,  $(\sqrt{Ww} - w)/(W - w) < x_1^* < \frac{1}{2}$ , from which it is easily seen that

$$\sqrt{Ww} < \bar{w}^* < \tilde{w}^*. \quad [\text{S37}]$$

When  $P = \rho$ , one of the eigenvalues of  $\mathbf{L}$  is one; hence,  $R(1; \rho) = 0$ . Another root of  $R(1; P) = 0$  is  $[(\bar{w}^*)^2 + \bar{w}^* \tilde{w}^*] / [Ww + \bar{w}^* \tilde{w}^*]$ , which by Eq. S37, is larger than one. As  $R(1; 0) = [(\bar{w}^*)^2 - (\tilde{w}^*)^2] / (\bar{w}^*)^2 < 0$  by Eq. S37, we deduce that, when  $0 < P < \rho$ ,  $R(1; P) < 0$ , whereas when  $\rho < P < 1$ ,  $R(1; P) > 0$ . Hence, when  $P < \rho$ ,  $R(1) < 0$ , and since  $a_2 = 1$ ,  $R(+\infty) > 0$ ; therefore, we conclude that  $R(\lambda) = 0$  has a positive root larger than one, and the largest positive eigenvalue of  $\mathbf{L}$  is larger than one.

When  $P > \rho$ , we have  $R(1) > 0$  and also,  $R(0) = a_0 > 0$ . As  $R(\lambda) = 0$  has two positive roots and as  $a_2 > 0$ ,  $R(\lambda)$  is convex: either the two positive roots are less than one or both larger than one. However, the product of the two roots is  $P^2 W^2 w^2 / (\bar{w}^*)^2 < 1$  by Eq. S37; thus, when  $P > \rho$ , the two positive eigenvalues of  $\mathbf{L}$  are less than one.

**Proof of Result 10.** Without loss of generality and for the ease of representation, we will show that, for  $t > 0$ ,

$$v(x; t) = \frac{1 - e^{-tx}}{1 - e^{-t}} \quad [\text{S38}]$$

is monotone increasing as a function of  $t$ . Observe that

$$\frac{\partial v}{\partial t} = \frac{(1 - e^{-t}) x e^{-tx} - (1 - e^{-tx}) e^{-t}}{(1 - e^{-t})^2}. \quad [\text{S39}]$$

For the monotonicity, we have to show that

$$f(x; t) = (1 - e^{-t}) x e^{-tx} - (1 - e^{-tx}) e^{-t} \geq 0 \quad [\text{S40}]$$

when  $t > 0$  and  $0 \leq x \leq 1$ . Note that  $f(0; t) = 0$  and  $f(1; t) = 0$ . Also,

$$\frac{\partial f}{\partial x} = (1 - e^{-t}) (e^{-tx} - t x e^{-tx}) - t e^{-tx} e^{-t} \quad [\text{S41}]$$

or

$$\frac{\partial f}{\partial x} = e^{-tx} [(1 - e^{-t}) (1 - tx) - t e^{-t}] = e^{-tx} g(x; t), \quad [\text{S42}]$$

say where for fixed  $t$ ,  $g(x; t)$  is a linear function of  $x$ , which vanishes at  $x_0 = (1 - e^{-t} - t e^{-t}) / t(1 - e^{-t})$ . If  $t > 0$ ,  $e^t > 1 + t$ ; therefore,  $1 > e^{-t}(1 + t)$  and  $x_0 > 0$ . Also, if  $t > 0$ ,  $e^{-t} > 1 - t$ , and therefore,  $1 - e^{-t} - t e^{-t} < t(1 - e^{-t})$  and  $x_0 < 1$ . Since  $g(0, t) = 1 - e^{-t} - t e^{-t} > 0$  and  $g(1; t) = (1 - e^{-t})(1 - t) - t e^{-t} < 0$  for  $t > 0$ , we deduce that  $\frac{\partial f}{\partial x}(x, t) > 0$  for  $0 < x < x_0$  and  $\frac{\partial f}{\partial x}(x, t) < 0$  for  $x_0 < x < 1$  for all  $t > 0$ . These facts combined with  $f(0, t) = f(1; t) = 0$  prove that  $f(x; t) \geq 0$  for  $0 \leq x \leq 1$  [in fact,  $f(x; t) > 0$  for  $0 < x < 1$ ], and inequality [S40] is satisfied as desired.

**Proof of Result 11.** The proof is based on induction on  $n$ , where to prove Eq. 45, we show that, if  $X_t$  is the number of individuals with phenotype  $A$  at stage  $t$  of the cycle and  $x$  is the initial frequency of  $A$ , then

$$E \left( \frac{X_t}{N} - x \right) \simeq \frac{1}{N} \rho S_t x (1 - x), \quad V \left( \frac{X_t}{N} \right) \simeq \frac{1}{N} t x (1 - x), \quad [\text{S43}]$$

where  $N$  is the size of the population. When  $t = 1$ , [S43] coincides with the constant environment case. Assuming [S43], we go to  $t + 1$ . Now,  $X_{t+1}$  given  $X_t = Ny$  has a binomial distribution with parameters  $(N, y')$ . Hence,

$$E \left( \frac{X_{t+1}}{N} - \frac{X_t}{N} \middle| X_t = Ny \right) = y' - y. \quad [\text{S44}]$$

Following ref. 1, chap. 5,  $y' - y \simeq (1/N) \rho s_{t+1} y (1 - y)$ , and therefore,

$$E \left( \frac{X_{t+1}}{N} - \frac{X_t}{N} \middle| X_t \right) \simeq \frac{1}{N} \rho s_{t+1} \frac{X_t}{N} \left( 1 - \frac{X_t}{N} \right). \quad [\text{S45}]$$

Observe that

$$E \left[ \frac{X_t}{N} \left( 1 - \frac{X_t}{N} \right) \right] = E \left( \frac{X_t}{N} \right) - E \left[ \left( \frac{X_t}{N} \right)^2 \right] = E \left( \frac{X_t}{N} \right) - V \left( \frac{X_t}{N} \right) - \left[ E \left( \frac{X_t}{N} \right) \right]^2. \quad [\text{S46}]$$

By the induction assumption,  $V(X_t/N) \simeq (1/N) t x (1 - x)$ , and ignoring terms of order  $1/N^2$ , we have

$$E \left( \frac{X_{t+1}}{N} - \frac{X_t}{N} \right) \simeq \frac{1}{N} \rho s_{t+1} E \left( \frac{X_t}{N} \right) \left[ 1 - E \left( \frac{X_t}{N} \right) \right]. \quad [\text{S47}]$$

Applying [S43], we have

$$\begin{aligned} E \left( \frac{X_t}{N} \right) &\simeq x + \frac{1}{N} \rho S_t x (1 - x), \\ 1 - E \left( \frac{X_t}{N} \right) &\simeq 1 - x - \frac{1}{N} \rho S_t x (1 - x), \end{aligned} \quad [\text{S48}]$$

and ignoring terms  $O(1/N^2)$ , we find

$$E\left(\frac{X_{t+1}}{N} - \frac{X_t}{N}\right) \simeq \frac{1}{N}\rho s_{t+1}x(1-x). \quad [\text{S49}]$$

Thus,

$$\begin{aligned} E\left(\frac{X_{t+1}}{N} - x\right) &= E\left(\frac{X_{t+1}}{N} - \frac{X_t}{N}\right) + E\left(\frac{X_t}{N} - x\right) \\ &\simeq \frac{1}{N}\rho s_{t+1}x(1-x) + \frac{1}{N}\rho s_t x(1-x), \end{aligned} \quad [\text{S50}]$$

and since  $S_t + s_{t+1} = S_{t+1}$ ,

$$E\left(\frac{X_{t+1}}{N} - x\right) \simeq \frac{1}{N}\rho S_{t+1}x(1-x) \quad [\text{S51}]$$

as desired.

We now compute  $V(X_{t+1}/N)$  using the induction assumption and the formula

$$V\left(\frac{X_{t+1}}{N}\right) = E\left[V\left(\frac{X_{t+1}}{N} \middle| X_t\right)\right] + V\left[E\left(\frac{X_{t+1}}{N} \middle| X_t\right)\right], \quad [\text{S52}]$$

where by [S43],

$$E\left(\frac{X_{t+1}}{N} \middle| X_t\right) \simeq \frac{X_t}{N} + \frac{1}{N}\rho s_{t+1} \frac{X_t}{N} \left(1 - \frac{X_t}{N}\right) \quad [\text{S53}]$$

and

$$V\left(\frac{X_{t+1}}{N} \middle| X_t\right) \simeq \frac{1}{N} \frac{X_t}{N} \left(1 - \frac{X_t}{N}\right). \quad [\text{S54}]$$

Here, we used the fact that  $y'(1-y') \simeq y(1-y)$ . Now,

$$E\left[V\left(\frac{X_{t+1}}{N} \middle| X_t\right)\right] \simeq \frac{1}{N} E\left[\frac{X_t}{N} \left(1 - \frac{X_t}{N}\right)\right] \simeq \frac{1}{N} x(1-x), \quad [\text{S55}]$$

where we use the same computations as led from [S46] to [S49]:

$$V\left[E\left(\frac{X_{t+1}}{N} \middle| X_t\right)\right] = V\left[\frac{X_t}{N} + \frac{1}{N}\rho s_{t+1} \frac{X_t}{N} \left(1 - \frac{X_t}{N}\right)\right]. \quad [\text{S56}]$$

Since  $(X_t/N)[1 - (X_t/N)]$  is a random variable taking values in  $[0,1]$ , its variance is less than  $1/4$  and

$$V\left[\frac{1}{N}\rho s_{t+1} \frac{X_t}{N} \left(1 - \frac{X_t}{N}\right)\right] \leq \frac{1}{4N^2}\rho^2 s_{t+1}^2. \quad [\text{S57}]$$

We ignore terms  $O(1/N^2)$ , so that the random variable  $(1/N)\rho s_{t+1}(X_t/N)[1 - (X_t/N)]$  is almost constant. As a result,

$$V\left[E\left(\frac{X_{t+1}}{N} \middle| X_t\right)\right] \simeq V\left(\frac{X_t}{N}\right) \simeq \frac{1}{N} t x(1-x) \quad [\text{S58}]$$

by the induction assumption. Combining [S55] and [S58] gives

$$V\left(\frac{X_{t+1}}{N}\right) \simeq \frac{1}{N} x(1-x) + \frac{1}{N} t x(1-x) = \frac{1}{N} (t+1)x(1-x) \quad [\text{S59}]$$

as expected.

**Calculation of Stable Vertical Transmission Rate in  $AkBl$ .** Here, we describe the analysis of the stability of a modifier allele  $m$  with vertical transmission rate  $\rho$  to invasion by a modifier  $M$  with a vertical transmission rate  $P$ , as described in Eq. 32, in environmental regime  $AkBl$ . The analysis is similar to that used in *Result 8* to analyze stability in  $A1B1$ , but it is numerical, because the cases where  $k > 1$  or  $l > 1$  require solving polynomials of degree  $> 6$  to obtain closed form expressions.

The analysis includes the following steps for fixed  $W$ ,  $w$ ,  $k$ , and  $l$ . First, we find the stable frequency of phenotype  $A$  with a single modifier  $x^*$ . This is done by minimizing the expression  $|x_{k+l} - x_0|$ , where  $x_t$  is defined in Eq. 9. The minimization is done by iterating the recurrence in Eq. 9 until it converges (i.e., until the difference  $|x_{k+l} - x_0|$  is smaller than available machine precision; roughly  $10^{-8}$  when subtracting similar small numbers). Second, we set the frequency vector with two modifiers to  $\underline{x}^* = (x^*, 1 - x^*, 0, 0)$  (that is, to the stable frequencies in the absence of modifier  $M$ ).

Now, we define  $F_A(\underline{x})$  by Eq. 32 with  $w_A = W$  and  $w_B = w$  ( $W > w$ ), and similarly, we define  $F_B(\underline{x})$  with  $w_B = W$  and  $w_A = w$ . Also, we define, similar to Eq. 34,  $F(\underline{x})$  by composition

$$F = \underbrace{F_B \circ \dots \circ F_B}_{l \text{ times}} \circ \underbrace{F_A \circ \dots \circ F_A}_{k \text{ times}}. \quad [\text{S60}]$$

To obtain a linear approximation of  $F(\underline{x})$  near  $\underline{x}^*$ , we calculate the Jacobian matrix of  $F(\underline{x})$  at  $\underline{x} = \underline{x}^*$ ,

$$\mathbf{J}_{ij} = \mathbf{J}(\underline{x}^*)_{ij} = \frac{\partial F(\underline{x}^*)_i}{\partial x_j}, \quad [\text{S61}]$$

and the  $2 \times 2$  external stability matrix  $\mathbf{L} = \mathbf{L}_{ex}$  is as in Eqs. S29 and S30 (note that the upper right block is 0, because  $x_3^* = x_4^* = 0$ ):

$$\mathbf{J} = \begin{bmatrix} \mathbf{L}_{in} & \mathbf{0} \\ * & \mathbf{L}_{ex} \end{bmatrix}. \quad [\text{S62}]$$

We calculate the eigenvalues  $\lambda_1 > \lambda_2$  of  $\mathbf{L}$  using the quadratic formula, as the characteristic polynomial of  $\mathbf{L}$  has degree 2. By the Perron–Frobenius theorem, the leading eigenvalue  $\lambda_1$  is real and positive. Denote by  $\lambda_1(\rho, P)$  the resulting leading eigenvalue with resident rate  $\rho$  and invader rate  $P$ . Note that, for any  $\rho \in (0, 1)$ ,

$$\lambda_1(\rho, \rho) = 1. \quad [\text{S63}]$$

The evolutionarily stable rate  $\rho^*$  is defined to be stable to invasion; that is, for a small enough value  $\partial P > 0$ , we have

$$\lambda_1(\rho^*, \rho^* \pm \partial P) < 1 = \lambda_1(\rho^*, \rho^*), \quad [\text{S64}]$$

where the equality is given by Eq. S63. Therefore,

$$\frac{\partial \lambda_1}{\partial P}(\rho^*, \rho^*) = 0. \quad [\text{S65}]$$

We use Brent’s (2) root-finding method to find  $\rho^*$  that satisfies Eq. S65. If, due to numerical instability of the described numerical process, we have

$$\frac{\partial \lambda_1}{\partial P}(0, 0) \cdot \frac{\partial \lambda_1}{\partial P}(1, 1) > 0 \quad [\text{S66}]$$

(i.e., the partial derivative sign is identical at  $\rho = P = 0$  and  $\rho = P = 1$ ), then we cannot use Brent’s (2) method. In these cases, we assume that the partial derivative does not have a root in  $(0, 1)$ , and we determine the stable rate  $\rho^*$  by the rule

$$\rho^* = \begin{cases} 0 & \text{if } \frac{\partial \lambda_1}{\partial P}(0, 0) \leq 0 \\ 1 & \text{if } \frac{\partial \lambda_1}{\partial P}(0, 0) > 0. \end{cases} \quad [\text{S67}]$$

Fig. S10 shows the sensitivity of the leading eigenvalue  $\lambda_1$  of the external stability matrix  $\mathbf{L}$  to changes in the invader rate  $P$  as a function of the resident rate  $\rho$  for different choices of environmental cycles  $AkBk$ .

The numerical analysis above is fine for small  $k$ , but for large  $k$  and especially for  $w = 0.1$ , the calculation is unstable. This is probably because when the environment is constant for a long period, most of the time the frequencies  $x_i$  are very close to the boundaries (i.e., zero and one).

Crucially, the Jacobian  $\mathbf{J}$  in Eq. S61 is calculated using automatic differentiation from a function that iteratively calculates  $F(\underline{x}^*)$  according to Eq. S60. Similarly, the partial derivative  $\frac{\partial \lambda_1}{\partial P}$  in Eq. S65 is calculated from a function that calculates  $\lambda_1$  using simple arithmetic operations. Note that automatic differentiation does not mean symbolic or numerical differentiation, which can lead to inefficient or inaccurate estimation of  $\mathbf{J}$  when  $k$  is not very small. Rather, from ref. 3, “Automatic differentiation is a set of techniques for transforming a program that calculates numerical values of a function, into a program which calculates numerical values for derivatives of that function with about the same accuracy and efficiency as the function values themselves.”

**Diffusion Approximation.** We compute the mean  $\mu(x)$  and the variance  $\sigma^2(x)$  of the change in one generation in the frequency of phenotype  $A$  given that, at the beginning of the generation,  $X_t = Nx$ . To compute  $\mu(x)$ , observe that, by Eq. 40,

$$x' - x = \frac{w_A x}{\bar{w}} \rho + (1 - \rho)x - x = \rho x \left[ \frac{w_A}{\bar{w}} - 1 \right] = \rho x (1 - x) \frac{w_A - w_B}{w_A x + w_B (1 - x)}, \quad [\text{S68}]$$

since  $\bar{w} = w_A x + w_B (1 - x)$ . For the diffusion approximation, it is essential that the differential selection does not have a large effect per individual in each time period  $\Delta t$  ( $\Delta t \simeq \frac{1}{N}$ ). That is, we assume that

$$w_A - w_B = \frac{s}{N}. \quad [\text{S69}]$$

Then,

$$x' - x \simeq \frac{1}{N} \rho s x (1 - x) \quad [\text{S70}]$$

up to terms of order small than  $\frac{1}{N}$ . Since one generation corresponds to  $\Delta t \simeq \frac{1}{N}$ , we conclude that

$$\mu(x) = \rho s x (1 - x); \quad 0 \leq x \leq 1. \quad [\text{S71}]$$

In the same way, we can compute

$$\sigma^2(x) = x(1 - x). \quad [\text{S72}]$$

1. Ewens W (2004) *Mathematical Population Genetics* (Springer, New York), 2nd Ed.  
2. Brent RP (1971) An algorithm with guaranteed convergence for finding a zero of a function. *Comput J* 14:422–425.

3. Bartholomew-Biggs M, Brown S, Christianson B, Dixon L (2000) Automatic differentiation of algorithms. *J Comput Appl Math* 124:171–190.

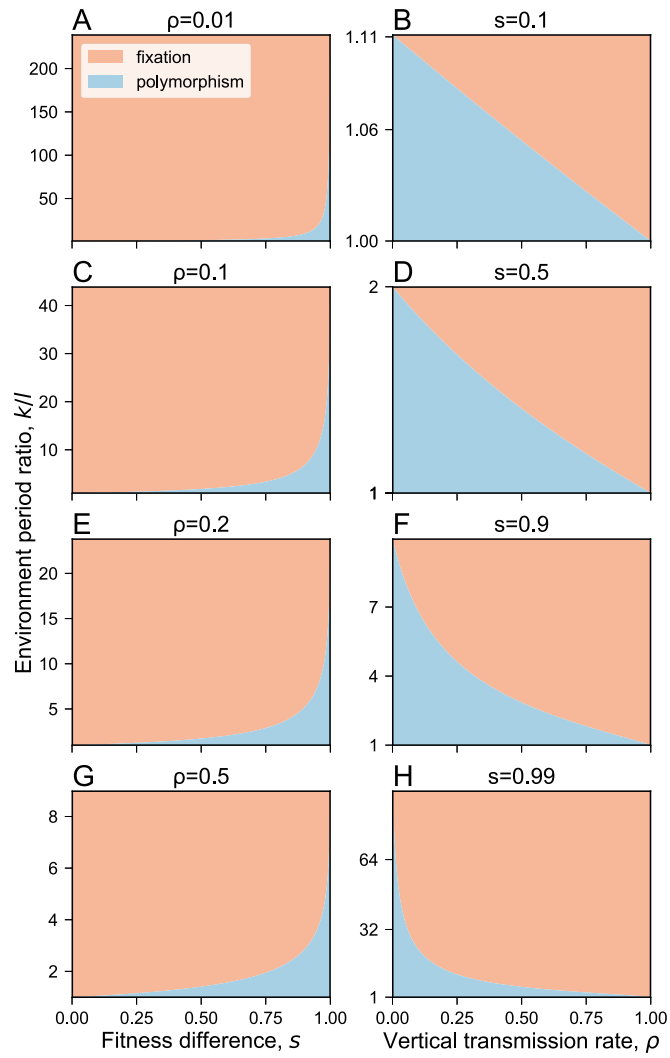

**Fig. S1.** Ratios of selection periods  $\frac{k}{l}$  that lead to fixation of phenotype A (red) or polymorphism of phenotypes A and B (blue);  $k$  and  $l$  are the numbers of generations in which phenotypes A and B, respectively, are favored by selection. In all cases,  $W = 1$ , and  $w = 1 - s$ . A, C, E, and G are for different  $\rho$  values and B, D, F, and H are for different  $s$  values.

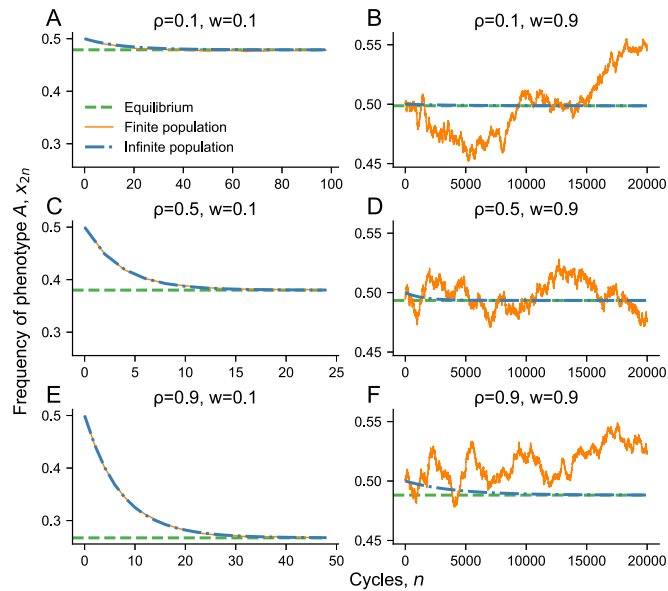

**Fig. S2.** Frequency of phenotype A after every two generations in selection regime A1B1. The orange line is the finite population model (Eqs. 40 and 41) (average of 100 simulations). The blue line is the infinite population model (Eq. 21), and the green line is the solution of  $Q(x) = 0$  (Eq. 22). In all cases,  $W = 1$ ; for the finite population model (orange lines), population size is  $N = 10,000$ , and initial frequency of A is  $x_0 = 0.5$ . A–F are for the shown values of  $\rho$  and  $w$ .

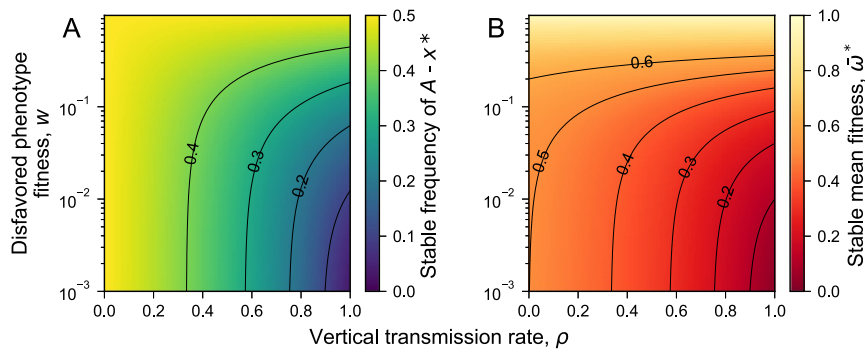

**Fig. S3.** Properties of stability in A1B1 selection regime. (A) Stable frequency of phenotype A and (B) stable mean fitness as functions of the vertical transmission rate  $\rho$  and the fitness of the disfavored phenotype  $w$ . Black contour lines join  $\rho$  and  $w$  combinations that result in the same stable value. In all cases, fitness of the favored phenotype is  $W = 1$ .



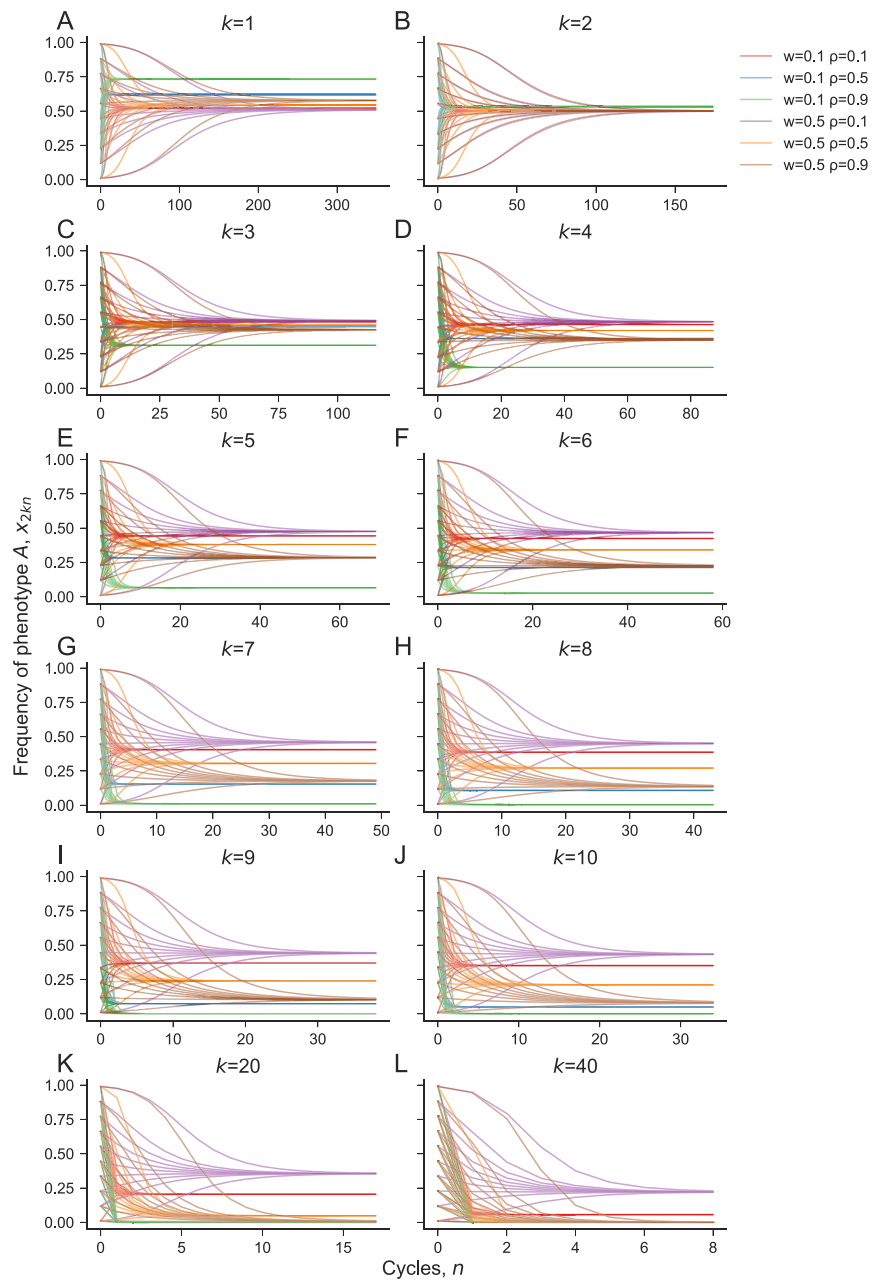

**Fig. S4.** Convergence of the frequency of phenotype A to a stable polymorphism in selection regime  $AkBk$ . Comparison of dynamics starting with different initial frequencies of phenotype A (0.01–0.99) and different  $k$ ,  $\rho$ , and  $w$  values. The lines show the  $x$  frequency of phenotype A at the end of each period after every  $2k$  generations. In all cases,  $W = 1$ . A–L are for the specified value of  $k$ .

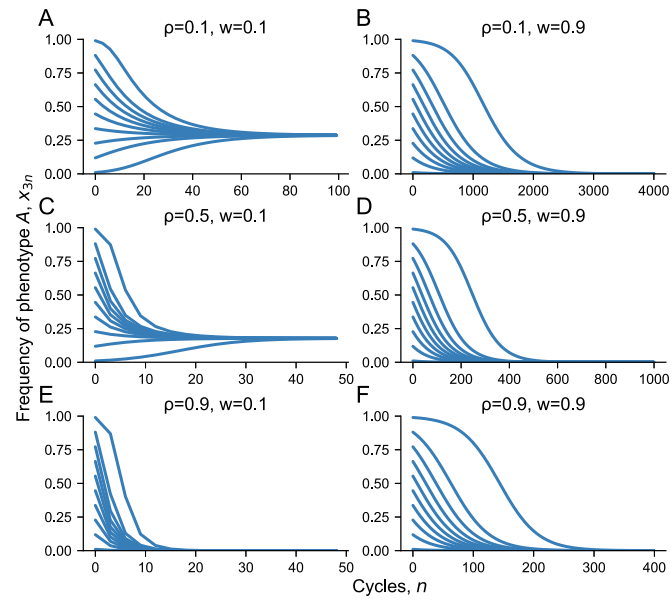

Fig. 55. Frequency of phenotype A after every three generations in selection regime A1B2. Comparison of dynamics starting with different initial frequency of phenotype A (0.01–0.99) (Figs. 1 and 7). In all cases,  $W = 1$ . A–F are for the specified values of  $\rho$  and  $w$ .

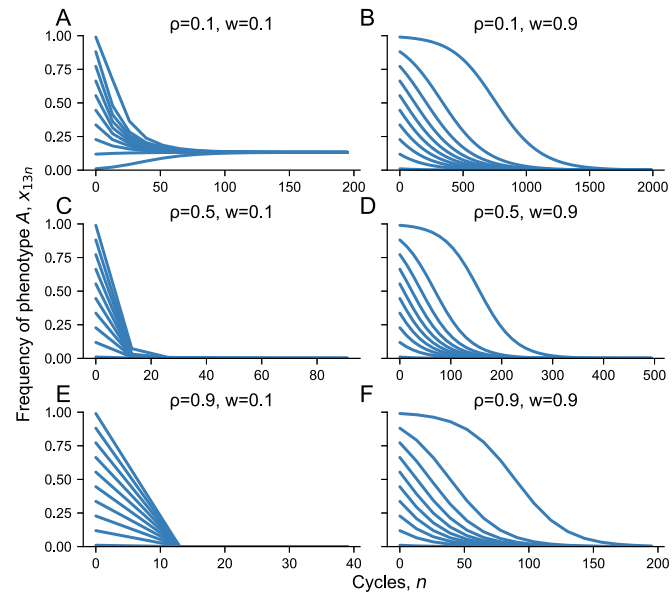

Fig. 56. Frequency of phenotype A after every 13 generations in selection regime A3B10. Comparison of dynamics starting with different initial frequency of phenotype A (0.01–0.99). In all cases,  $W = 1$ . A–F are for the specified values of  $\rho$  and  $w$ .

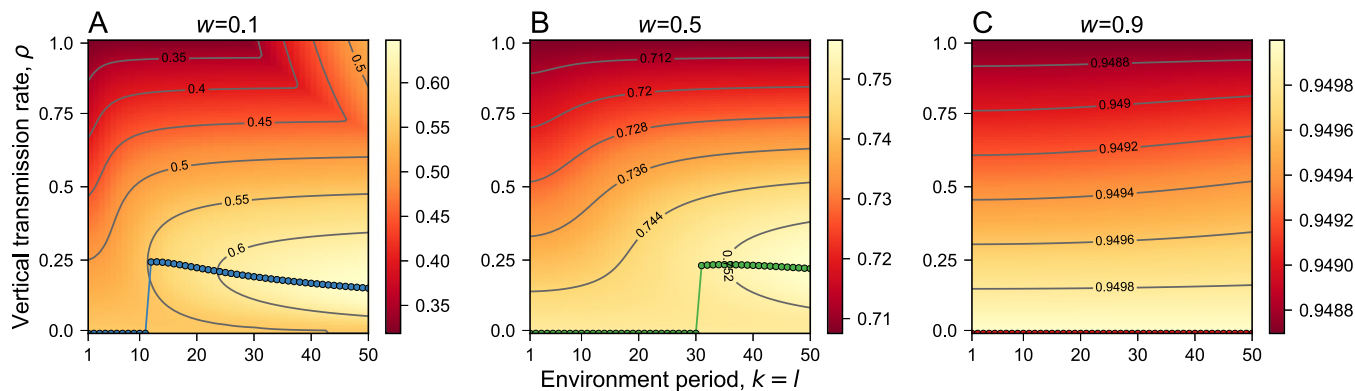

**Fig. 57.** Stable population mean fitness in selection regime  $AkBk$  as a function of the vertical transmission rate  $\rho$  and the number  $k$  of generations in which phenotypes  $A$  and  $B$  are favored by selection for different selection intensities: (A)  $w = 0.1$ , (B)  $w = 0.5$ , and (C)  $w = 0.9$ . Colors represent the geometric average of the stable population mean fitness over  $2k$  generations calculated by iterating Eq. 9 until phenotype frequencies stabilized and for at least 1,000 generations. Blue markers show the maximum average mean fitness for each period  $k$ . For example, with  $w = 0.1$ ,  $\hat{\rho} = 0$  maximizes the average fitness for  $k \leq 11$ ; then,  $\hat{\rho}$  increases to  $\hat{\rho} \approx 0.24$  and continues to decrease as  $k$  increases, down to  $\hat{\rho} \approx 0.15$  for  $k = 50$  (Fig. 6). Contour lines represent  $\rho$  and  $k$  combinations that produce the same average mean fitness. In all cases,  $W = 1$ .

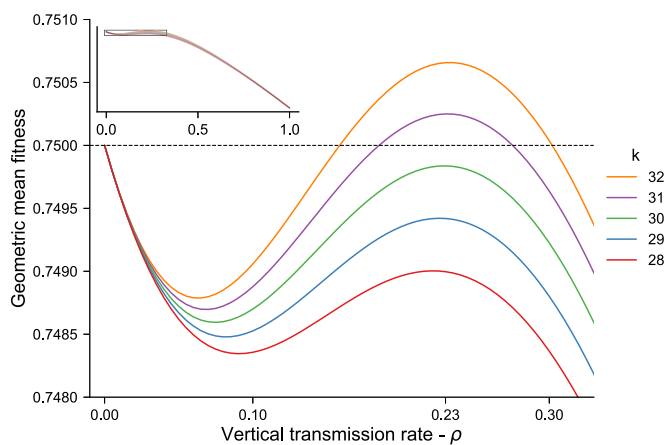

**Fig. 58.** The geometric average of the stable population mean fitness over the  $2k$  generation period peaks at  $\rho = 0$  for  $k \leq 30$  (red, blue, and green lines) and at  $\rho \approx 0.23$  for  $k = 31$  and  $32$  (purple and orange lines, respectively) (Fig. 6). *Inset* zooms out to show that the geometric mean fitness is strictly and significantly decreasing for  $\rho > 0.3$  (reaching  $\approx 0.7$  for  $\rho = 1$ ). In all cases,  $W = 1$  and  $w = 0.5$ .

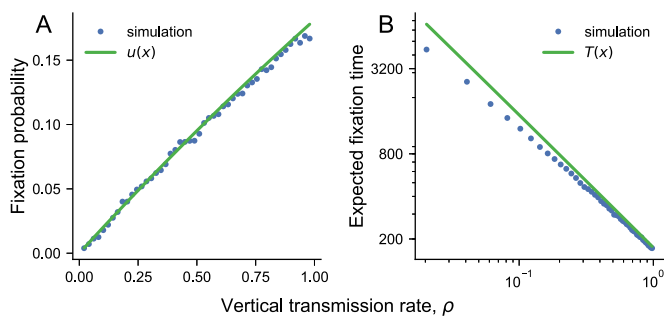

**Fig. 59.** Fixation probability and mean time in a finite population. (A) Fixation probability  $u(x)$  of phenotype  $A$  (Eq. 42). (B) Expected time to fixation  $T(x)$  of phenotype  $A$  (Eq. 43) conditioned on its fixation, starting with a single copy in a population of size  $N$ . The figure compares two estimates: Wright-Fisher simulations (blue circles) and diffusion equation approximation (green solid lines). Parameters: selection coefficient,  $s = w_A - w_B = 0.1$ ; population size,  $N = 10,000$ .

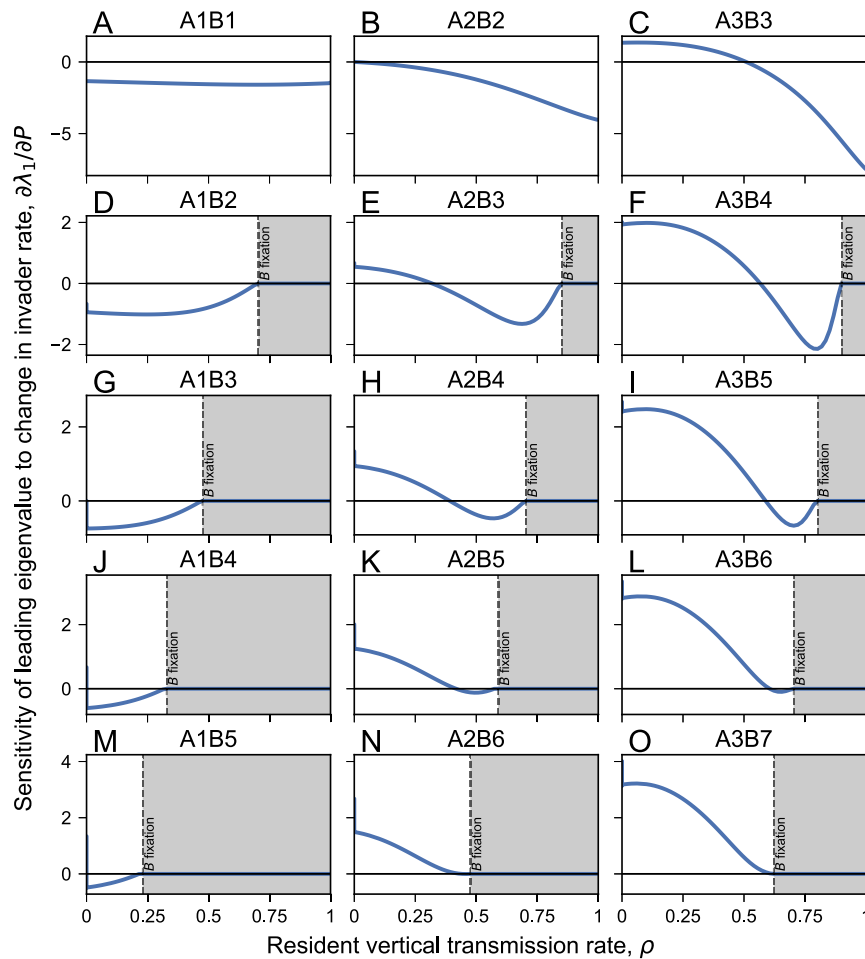

**Fig. S10.** Evolutionarily stable vertical transmission rate in  $AkBI$  selection regime. The figure shows  $\frac{\partial \lambda_1}{\partial P}$ , the sensitivity of the leading eigenvalue of the external stability matrix  $L$  to changes in  $P$  (the vertical transmission rate of the invader allele) as a function of  $\rho$ , the vertical transmission rate of the resident allele (details are in *Evolutionary Stability of Oblique Transmission* and *SI Text*). The shaded areas mark  $\rho$  values for which phenotype  $B$  fixes and there is no polymorphism (Eq. 20). Without polymorphism, selection does not affect the transmission rate, and therefore, any rate in the shaded areas is neutrally stable. In  $A, B, D, G, J,$  and  $M$ ,  $\frac{\partial \lambda_1}{\partial P} < 0$  at the vicinity of  $\rho = 0$ , and therefore, the stable rate is  $\rho^* = 0$ . In  $B, C, E, F, H, I, K,$  and  $L$ , the stable rate  $\rho^*$  can be identified as the  $\rho$  value at which  $\frac{\partial \lambda_1}{\partial P}$  changes from positive to negative. In  $N$  and  $O$ ,  $\frac{\partial \lambda_1}{\partial P} > 0$  for all  $\rho$  values that protect polymorphism, and therefore, there are only neutrally stable rates (in the shaded areas). Here,  $W = 1$  and  $w = 0.1$ .

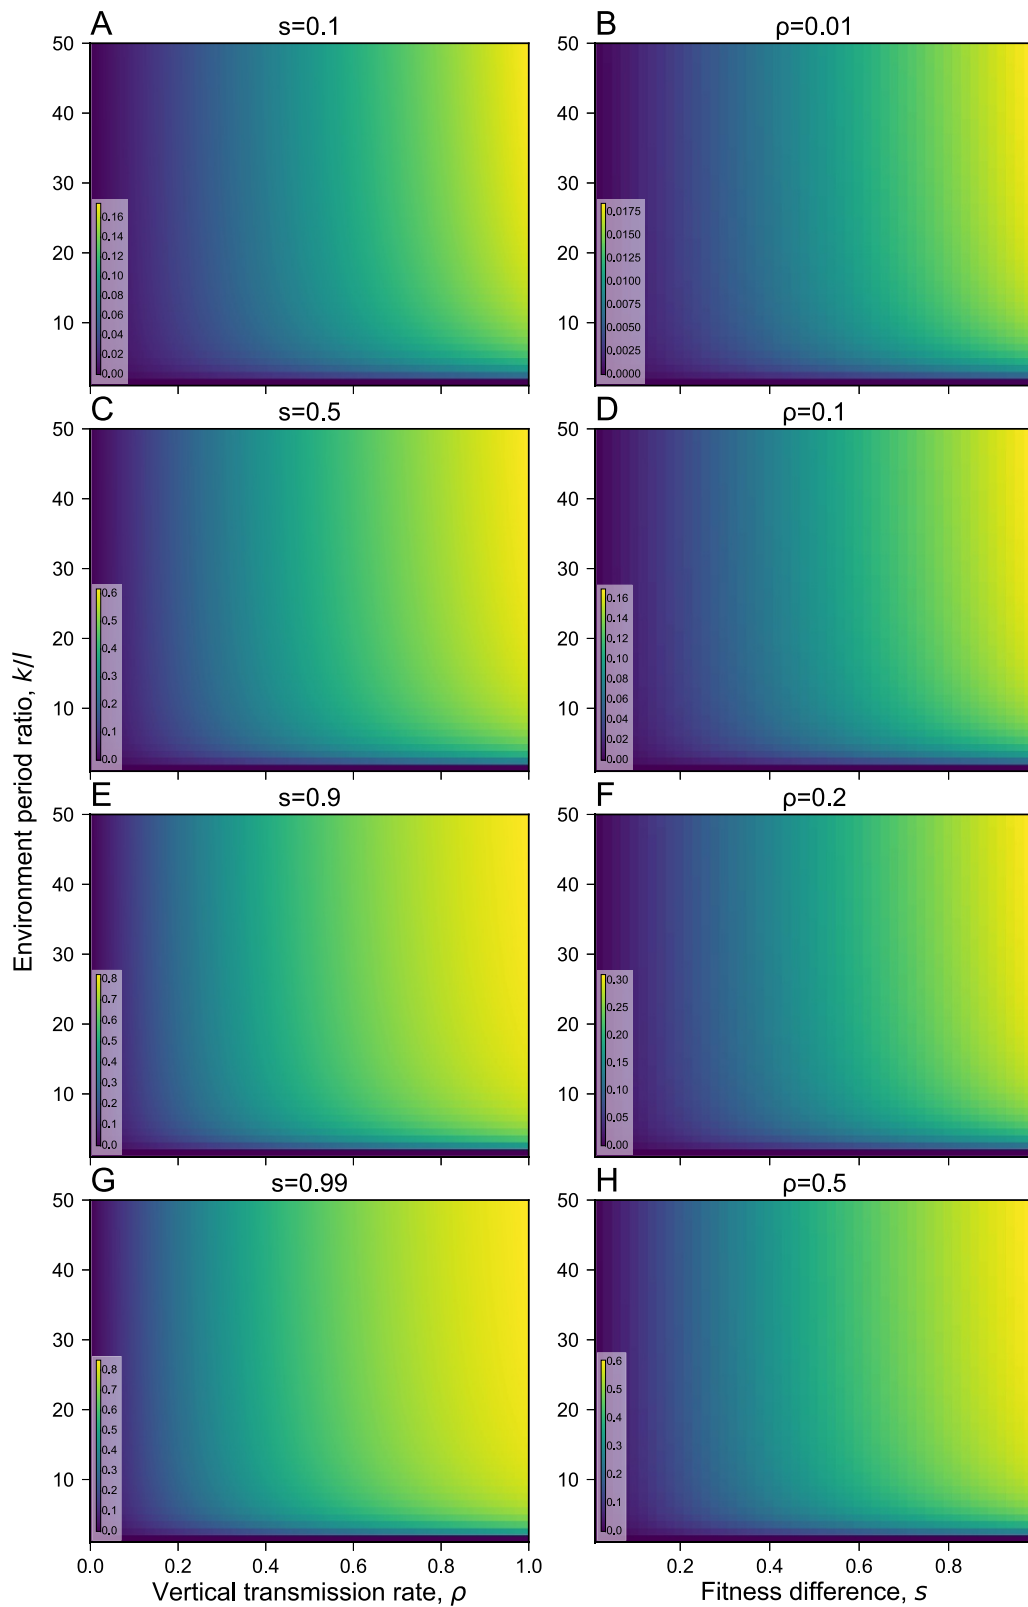

**Fig. S11.** Fixation in a finite population with different ratios of selection periods  $\frac{k}{l}$ . Fixation probability of phenotype A when starting with a single copy in a population of size  $N$ :  $u(1/N) = (1 - \exp(-2\rho \frac{k-l}{k+l}(W-w)))/(1 - \exp(-2N\rho \frac{k-l}{k+l}(W-w)))$  (Eqs. 46 and 47);  $k$  and  $l$  are the numbers of generations in which phenotypes A and B, respectively, are favored by selection. In all cases, fitness of the favored phenotype is  $W = 1$ ; fitness of the unfavored phenotype is  $w = 1 - s$ , and the population size is  $N = 10,000$ . A, C, E, and G are for the specified value of  $s$  and B, D, F, and H are for the specified value of  $\rho$ .

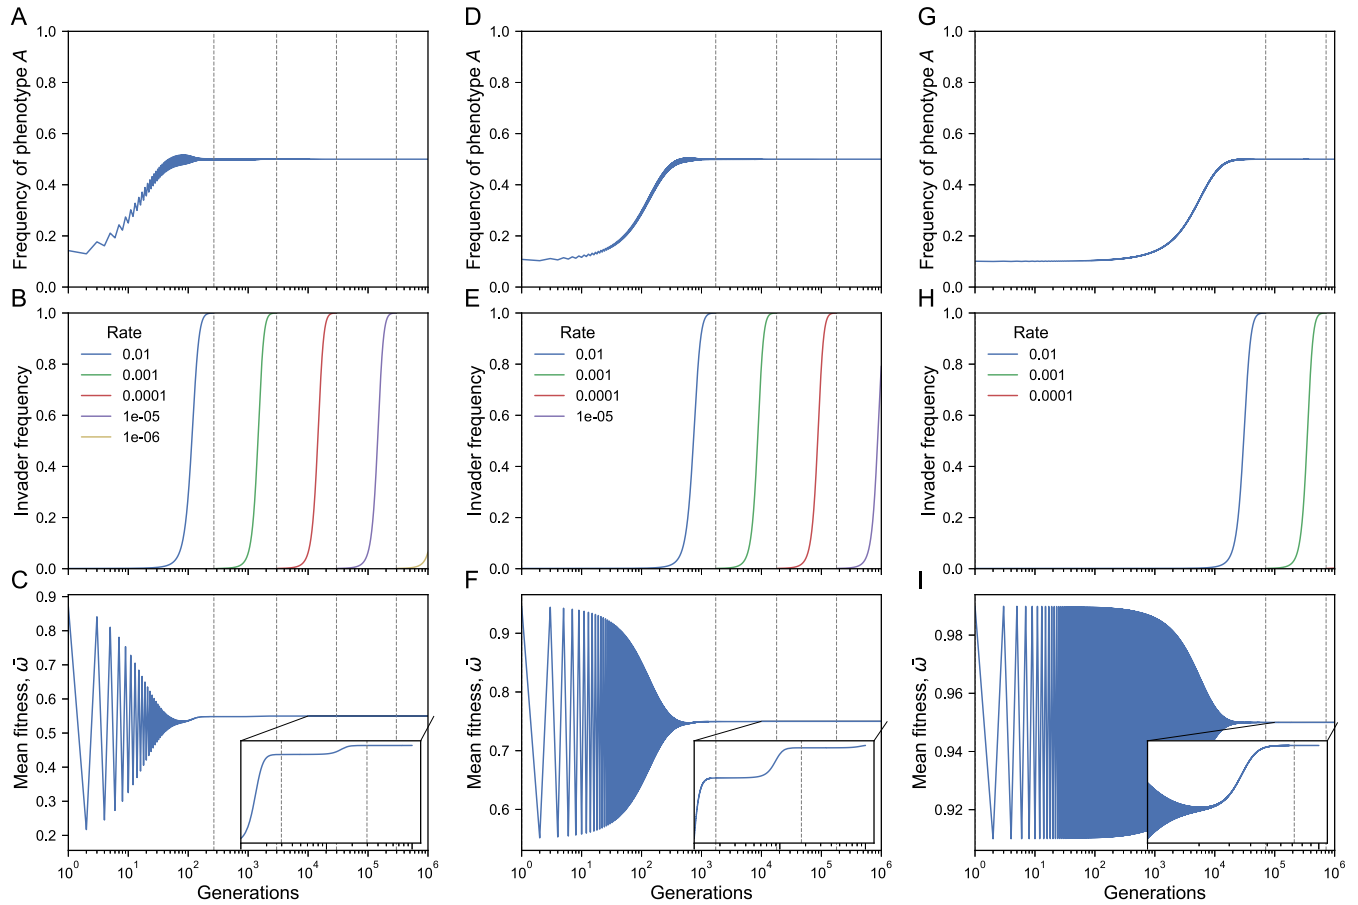

**Fig. S12.** Consecutive fixation of modifiers that reduce the vertical transmission rate in selection regime *A1B1*. The figure shows results of numerical simulations of evolution with two modifier alleles (Eq. 32). When a modifier allele fixes (frequency >99.9%), a new modifier allele is introduced with a vertical transmission rate one order of magnitude lower (vertical dashed lines). (A, D, and G) The frequency of phenotype A in the population over time. (B, E, and H) The frequency of the invading modifier allele over time. (C, F, and I) The population geometric mean fitness over time; *insets* zoom in to show that the mean fitness decreases slightly with each invasion. Invading alleles are introduced at frequency 0.01%; whenever their frequency drops below 0.01%, they are reintroduced. Parameters: vertical transmission rate of the initial resident modifier allele,  $\rho_0 = 0.1$ ; fitness values:  $W = 1$  and  $w = 0.1$  (A–C), 0.5 (D–F), and 0.9 (G–I). The x axis is on a log scale, as each sequential invasion takes an order of magnitude longer to complete. D–F are the same as in Fig. 4.
